# Supplementary material for: Myeloid Krüppel-Like Factor 2 Critically Regulates K/BxN Serum-Induced Arthritis
Source: MDPI journal article supplement (doi:10.3390/cells8080908), 2019-08-16
Supplement: s1 [file s1]

UCSC genome browser track of mouse genome analyzed and three genomic sites were chosen to analyze by ChIP-PCR. The red bar indicates the locations that analyzed by ChIP-RT-PCR.

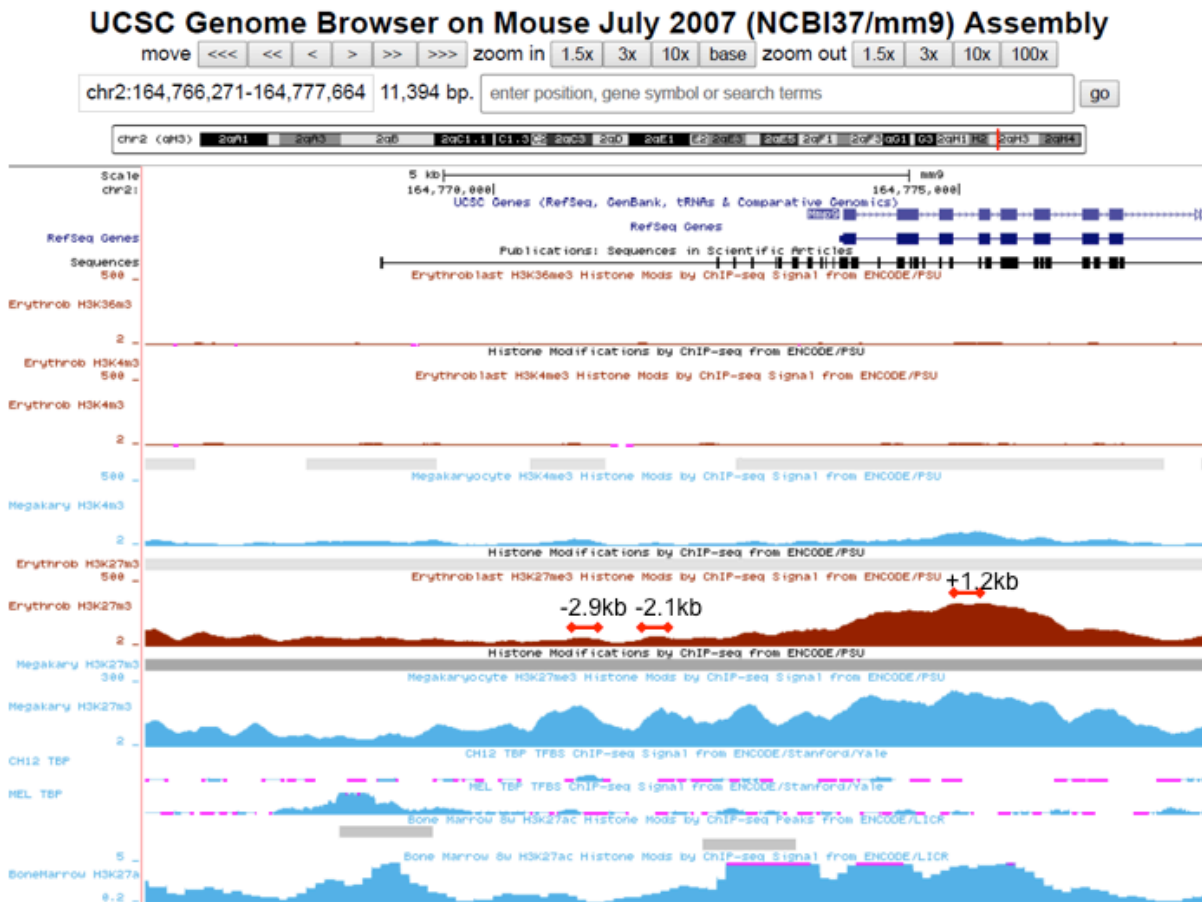

**Supplemental Figure 2.** Density measurement of western blot data shown in Figure 5E.

Density measurements of the western blot data shown in Fig. 5E

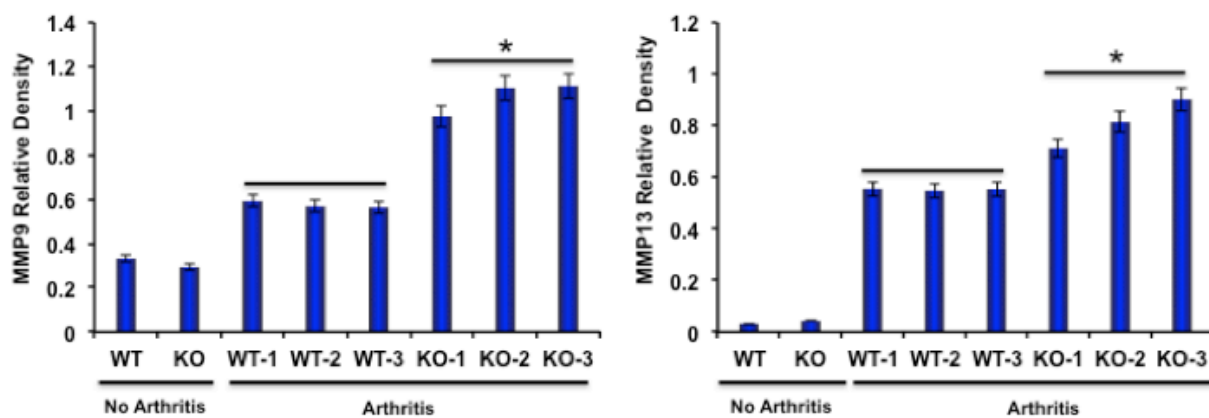

**Supplemental Table I.** Primer sequences used for chromatin immunoprecipitation assays.

**Table I.** Primer sequences used for chromatin immunoprecipitation assays

| Name                     | Forward primer               | Reverse primer              | Product Length (bp) | Genome Region From TSS |
|--------------------------|------------------------------|-----------------------------|---------------------|------------------------|
| chr2:164775019-164775122 | 5'-ATCTGTCCGCTCTTATGCTG-3'   | 5'-TTGAGAAGAGGTGACTGCGAC-3' | 103                 | +1.2 kb                |
| chr2:164771647-164771863 | 5'-TCACGGGGACCTGAGATCAT-3'   | 5'-TGACCCACTTGGCCATTTC-3'   | 238                 | -2.1 kb                |
| chr2:164770742-164770948 | 5'-ATAGTGGGACCCTGCC TCAA -3' | 5'-ACGTGGTGTGTCCAGTCT-3'    | 205                 | -2.9 kb                |
